# Supplementary material for: Valuing the impact of Self-rated Health and Social Support on life satisfaction among Hong Kong Chinese population
Source: Research Square preprint supplement (doi:10.21203/rs.3.rs-155505/v1), 2021-02-12
Supplement: Supplementary file 1 [file d324352de25c192024687ac3.docx]

**Additional file 1** Implicit WTPs of self-rated health status and social support from well-being valuation studies in an Asian context

| **Context [study]** | **Source of Data** | **Adjustment of the endogeneity concern** | **Implicit WTP** a,b  (unit) |
| --- | --- | --- | --- |
| ***Self-rated health status*** | | | |
| United Kingdom, [Powdthavee, 2007] | British Household Panel Survey (BHPS), 1997-2003 | No | US$37,875 – US$38,000 (capita real HI) |
| United States,  [Brown, 2015] | Twenty-eight cross-sections of General Social Survey, 1975-2010 | Yes | US$3,471  (equivalised income) |
| Thailand  [Chandoevwit & Thampanishvong, 2016] | National cross-sectional survey, 2012 | Yes | US$137-US$141  (capita *HI*) |
| Japan  [Tsurumi & Managi, 2017] | National cross-sectional survey, 2013 | No | US$52,500  (*HI*) |
| ***Social Support / Social Interaction*** | | | |
| United Kingdom, [Powdthavee, 2007] | British Household Panel Survey (BHPS), 1997-2003 | No | *Meeting friends and relatives*  US$7,800- US$7,919  (capita *HI*)  *Talking to neighbors*  US$4,916 –US$5,100  (capita *HI*) |
| Thailand  [Chandoevwit & Thampanishvong, 2016] | National cross-sectional survey, 2012 | Yes | *Interaction with neighbors c*  US$137-US$141 (capita *HI*) |
| Japan  [Tsurumi & Managi, 2017] | National cross-sectional survey, 2013 | No | *One-person increase in “reliable people”*  US$328 - US$679 (HI) |

a Estimates of the WTPs are all standardized into $US based on the conversion rates reported within each study. In addition, all estimates are standardized to a monthly basis.

b Responses ranges from “poor health” to “excellent health”

c Responses ranges from “never” to “on most days”;

d Responses ranges from “no interactions” to “frequently”;

HI: Household Income; Implicit WTP: Implicit Willingness-to-pay
